# Supplementary material for: Obsessive-compulsive personality disorder symptoms as a risk factor for postpartum depressive symptoms
Source: PubMed Central journal article supplement (PMC6647494; doi:10.1007/s00737-018-0908-0), 2018-08-31
Supplement: 737_2018_908_MOESM3_ESM.pdf [file 737_2018_908_MOESM3_ESM.pdf]

### ONLINE RESOURCE 3: SUPPLEMENTARY TABLE 2.

Supplementary Table 2. Complete multinomial regression for trajectories of postpartum depressive symptoms.

|                                               | B (SE)       | OR (95% CI)         |
|-----------------------------------------------|--------------|---------------------|
| <i>Increasing-decreasing vs. Low symptoms</i> |              |                     |
| OCPD trait symptoms                           | 0.23 (0.05)  | 1.26 (1.14-1.39)*** |
| Age                                           | -0.05 (0.05) | 0.96 (0.87-1.05)    |
| Low-medium educational level                  | 0.25 (0.35)  | 1.29 (0.65-2.55)    |
| Unplanned pregnancy                           | -0.51 (0.96) | 0.60 (0.09-3.93)    |
| Previous depressive episode(s)                | 1.10 (0.39)  | 3.00 (1.39-6.47)**  |
| Primiparity                                   | 0.14 (0.36)  | 1.15 (0.57-2.32)    |
| <i>Increasing vs. Low symptoms</i>            |              |                     |
| OCPD trait symptoms                           | 0.15 (0.07)  | 1.16 (1.02-1.32)*   |
| Age                                           | 0.14 (0.08)  | 1.15 (0.99-1.34)    |
| Low-medium educational level                  | 0.65 (0.47)  | 1.92 (0.76-4.86)    |
| Unplanned pregnancy <sup>a</sup>              | -            | -                   |
| Previous depressive episode(s)                | 0.65 (0.54)  | 1.92 (0.66-5.55)    |
| Primiparity                                   | -0.06 (0.49) | .94 (0.36-2.43)     |

SE, standard error; OR, odds ratio; CI, confidence interval. OCPD trait symptoms and age are expressed on a continuous scale; all other variables are dichotomous. \* $p < .05$ , \*\* $p < .01$ , \*\*\* $p < .001$ . <sup>a</sup>Effect could not be estimated as none of the women belonging to the *Increasing symptoms trajectory* reported their pregnancy as being unplanned.

### Obsessive-compulsive personality disorder symptoms as a risk factor for postpartum depressive symptoms

*Archives of Women's Mental Health*

Kiki E.M. van Broekhoven, Annemiek Karreman, Esther E. Hartman, Paul Lodder, Joyce J.

Endendijk, Veerle Bergink, Victor J.M. Pop<sup>1</sup>. <sup>1</sup>Corresponding author. Email address:

[v.j.m.pop@uvt.nl](mailto:v.j.m.pop@uvt.nl). Department of Medical and Clinical Psychology, Tilburg University.
